# Supplementary material
Source: MDPI journal article supplement (https://www.mdpi.com/2311-5637/8/10/515)
Supplement: s1 [file s1]

**Supplemented Table S1.** Concentration of sugars and inhibitors in sugarcane bagasse hydrolysate

| Compounds  |                    | Concentration (g/L)            |
|------------|--------------------|--------------------------------|
| Sugars     | <u>Total sugar</u> | <u>20.2 ± 3.12<sup>c</sup></u> |
|            | Xylose             | 17.15 ± 0.15 <sup>a</sup>      |
|            | Glucose            | 1.87 ± 0.08 <sup>cd</sup>      |
|            | Arabinose          | 3.14 ± 0.094 <sup>b</sup>      |
|            | Acetic acid        | 1.06 ± 0.03 <sup>ac</sup>      |
| Inhibitors | Furfural           | 0.27 ± 0.015 <sup>b</sup>      |
|            | HMF                | 0.09 ± 0.004 <sup>ac</sup>     |

<sup>abcd</sup> the mean values bearing different letters within the same column are significantly different at the level  $p < 0.05$  using Duncan's multiple range test.

**Supplemented Table S2.** Matrix design for experimental and predicted values of efficiency of ethanol production (after Plackett-Burman) from SCB using *M. guilliermondii* H1 at 40 °C for 48 h

| Run | Independent variables |    |      |     |     |     |   |     | Ethanol concentration (g/L) |         |
|-----|-----------------------|----|------|-----|-----|-----|---|-----|-----------------------------|---------|
|     | A                     | B  | C    | D   | E   | F   | G | H   | actual                      | predict |
| 1   | 3                     | 20 | 0.05 | 0.2 | 0.5 | 3   | 4 | 0.3 | 6.36 ± 0.07a                | 6.40    |
| 2   | 0.1                   | 40 | 0.05 | 0.2 | 0.1 | 0.3 | 4 | 3   | 8.87 ± 0.055bc              | 9.02    |
| 3   | 3                     | 40 | 0.01 | 2   | 0.5 | 0.3 | 4 | 3   | 9.48 ± 0.072b               | 9.66    |
| 4   | 3                     | 20 | 0.01 | 2   | 0.1 | 3   | 4 | 3   | 6.79 ± 0.063ac              | 6.61    |
| 5   | 0.1                   | 20 | 0.05 | 2   | 0.5 | 0.3 | 6 | 3   | 7.71 ± 0.1c                 | 7.42    |
| 6   | 3                     | 20 | 0.05 | 2   | 0.1 | 0.3 | 6 | 0.3 | 7.82 ± 0.075ab              | 8.11    |
| 7   | 3                     | 40 | 0.01 | 0.2 | 0.5 | 0.3 | 6 | 0.3 | 10.15 ± 0.11b               | 9.97    |
| 8   | 0.1                   | 40 | 0.01 | 2   | 0.1 | 3   | 6 | 0.3 | 9.08 ± 0.085a               | 9.12    |
| 9   | 0.1                   | 20 | 0.01 | 0.2 | 0.1 | 0.3 | 4 | 0.3 | 5.17 ± 0.04c                | 5.02    |
| 10  | 0.1                   | 20 | 0.01 | 0.2 | 0.5 | 3   | 6 | 3   | 5.96 ± 0.051bd              | 6.25    |
| 11  | 3                     | 40 | 0.05 | 0.2 | 0.1 | 3   | 6 | 3   | 11.08 ± 0.094a              | 10.93   |
| 12  | 0.1                   | 40 | 0.05 | 2   | 0.5 | 3   | 4 | 0.3 | 8.62 ± 0.037cd              | 8.58    |

A: NH<sub>4</sub>SO<sub>4</sub> (g/L); B: Substrate concentration (g/L); C: ZnSO<sub>4</sub>.7H<sub>2</sub>O (g/L); D: MgSO<sub>4</sub>.7H<sub>2</sub>O (g/L);  
E: MnSO<sub>4</sub>.H<sub>2</sub>O (g/L); F: KH<sub>2</sub>PO<sub>4</sub> (g/L); G: pH; H: CaCl<sub>2</sub>.2H<sub>2</sub>O (g/L)

<sup>abcd</sup> the mean values bearing different letters within the same column are significantly different at the level  $p < 0.05$  using Duncan's multiple range test.

**Supplemented Table S3.** Matrix design for experimental and predicted values of efficiency of ethanol production (after Box-Behnken) from SCB using *M. guilliermondii* H1 at 40 °C for 48 h.

| Run | A:(NH <sub>4</sub> ) <sub>2</sub> SO <sub>4</sub><br>(g/L) | B:Substrate concentration<br>(g/L) | C:pH | Ethanol concentration (P, g/L) |           |
|-----|------------------------------------------------------------|------------------------------------|------|--------------------------------|-----------|
|     |                                                            |                                    |      | actual                         | predicted |
| 1   | 0.1                                                        | 30                                 | 4    | 6.99 ± 0.066a                  | 7.04      |
| 2   | 1.55                                                       | 20                                 | 6    | 7.85 ± 0.048bc                 | 7.83      |
| 3   | 1.55                                                       | 40                                 | 6    | 11.12 ± 0.087ac                | 11.15     |
| 4   | 1.55                                                       | 30                                 | 5    | 10.27 ± 0.082b                 | 10.28     |
| 5   | 3                                                          | 30                                 | 6    | 10.48 ± 0.054bc                | 10.43     |
| 6   | 1.55                                                       | 30                                 | 5    | 10.22 ± 0.049a                 | 10.28     |
| 7   | 1.55                                                       | 20                                 | 4    | 6.35 ± 0.033c                  | 6.32      |
| 8   | 0.1                                                        | 30                                 | 6    | 8.63 ± 0.065c                  | 8.67      |
| 9   | 1.55                                                       | 30                                 | 5    | 10.34 ± 0.086ac                | 10.28     |
| 10  | 3                                                          | 40                                 | 5    | 10.85 ± 0.093ab                | 10.86     |
| 11  | 1.55                                                       | 40                                 | 4    | 8.87 ± 0.061a                  | 8.89      |
| 12  | 3                                                          | 20                                 | 5    | 7.64 ± 0.043d                  | 7.71      |
| 13  | 0.1                                                        | 40                                 | 5    | 9.22 ± 0.065ac                 | 9.15      |
| 14  | 0.1                                                        | 20                                 | 5    | 6.41 ± 0.034cd                 | 6.40      |
| 15  | 1.55                                                       | 30                                 | 5    | 10.3 ± 0.057d                  | 10.28     |
| 16  | 3                                                          | 30                                 | 4    | 8.33 ± 0.029bd                 | 8.29      |
| 17  | 1.55                                                       | 30                                 | 5    | 10.26 ± 0.064ae                | 10.28     |

<sup>abcde</sup> the mean values bearing different letters within the same column are significantly different at the level  $p < 0.05$  using Duncan's multiple range test.
